# Supplementary material
Source: MDPI journal article supplement (https://www.mdpi.com/2073-4344/5/1/270)
Supplement: s1 [file s1]

## Supplementary Information

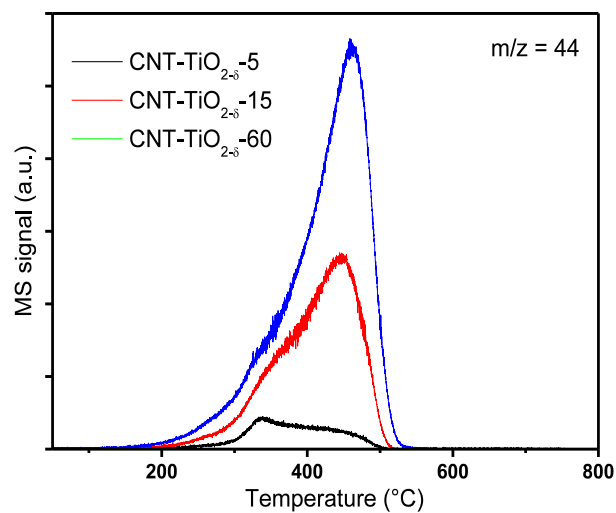

**Figure S1.** MS profiles ( $m/z = 44$ ) for the CNT-TiO<sub>2-δ</sub> composites recorded in a mass spectrometer coupled in the exhaust stream of TG analysis.

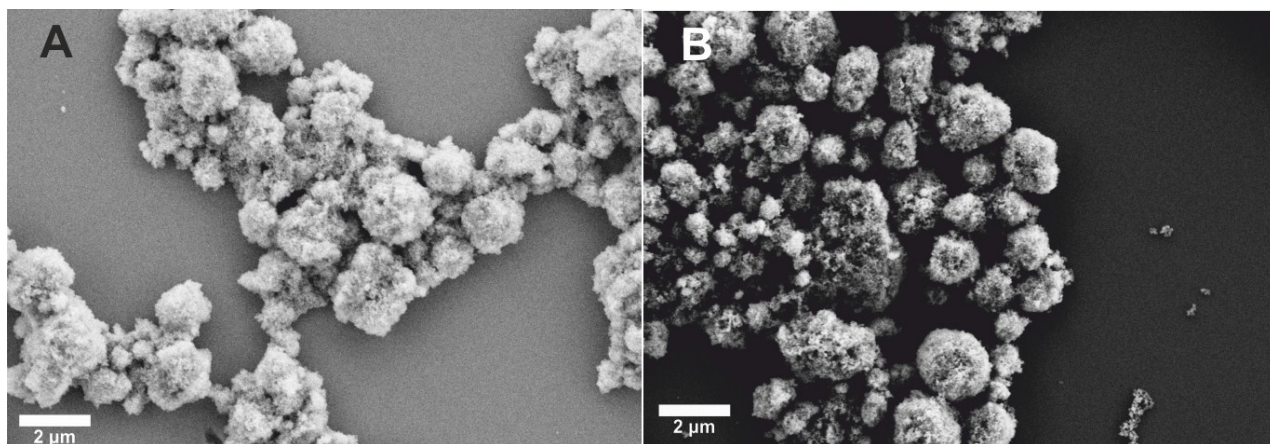

**Figure S2.** SEM images for pristine TiO<sub>2</sub> and TiO<sub>2-δ</sub>.

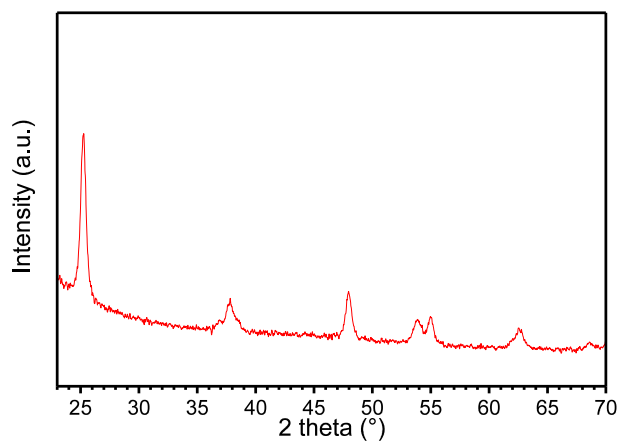

**Figure S3.** XRD pattern of CVD-synthesized FeO<sub>x</sub>/TiO<sub>2</sub> composite used as catalyst for CNT growth.

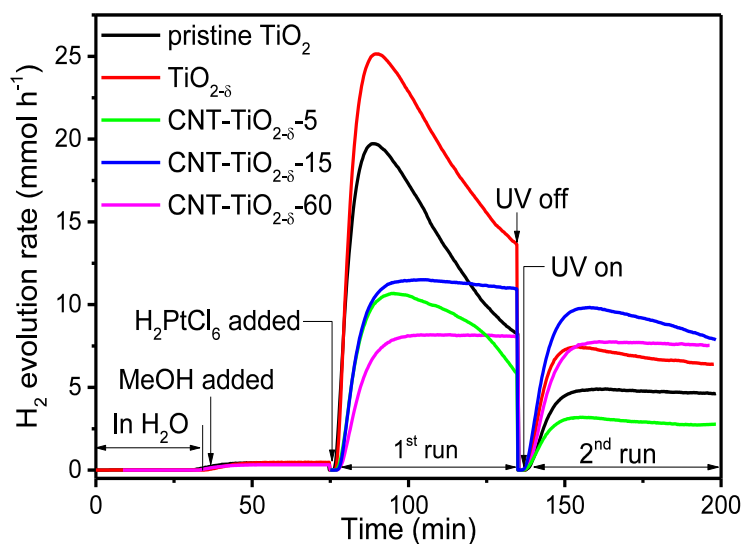

**Figure S4.** Temporal H<sub>2</sub> evolution rates in pure water, in water/methanol mixture and after the addition of H<sub>2</sub>PtCl<sub>6</sub> precursor.

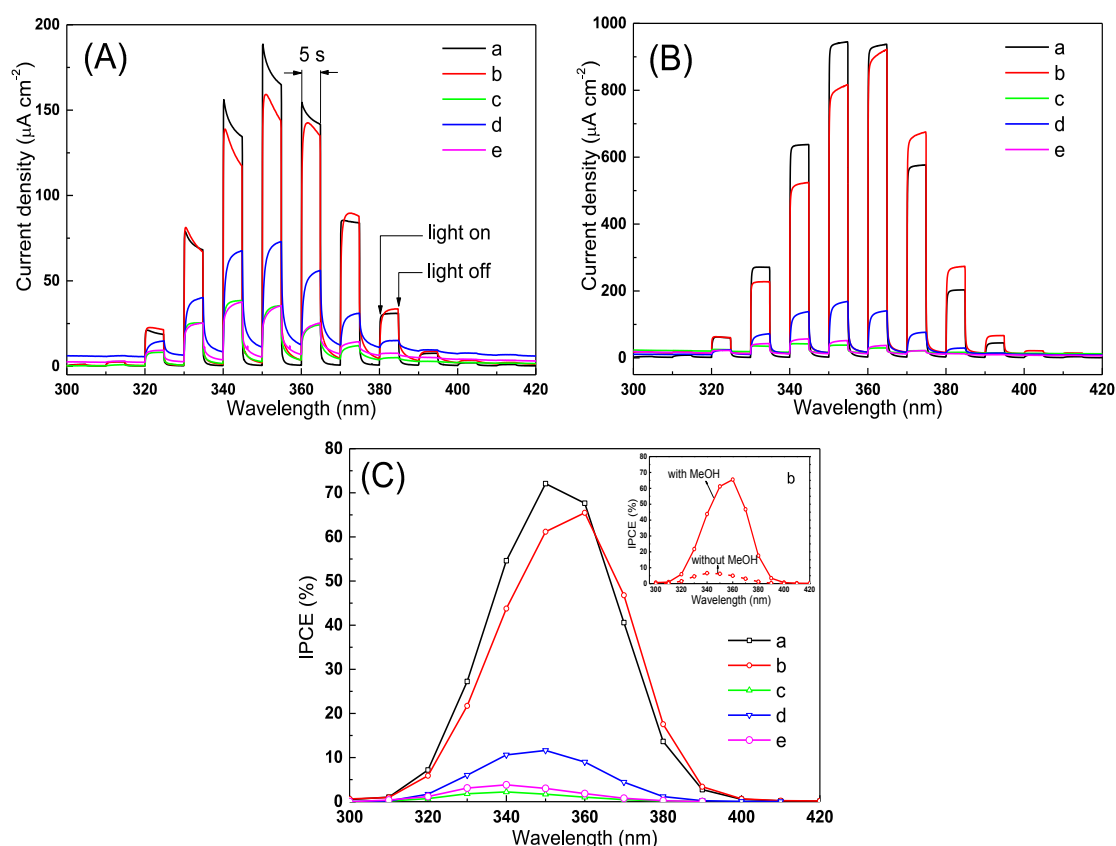

**Figure S5.** Photocurrent responses under intermittent irradiation at different wavelengths in a phosphate buffer (pH 7.0) at 0.5 V vs. Ag/AgCl without (A) and with (B) methanol (2 mL); incident photon-to-current efficiency (IPCE) in the presence of methanol calculated based on the photocurrent responses (C). Inserted figure in (C): IPCE of TiO<sub>2-δ</sub> with and without methanol. Samples a, b, c, d and e refer to pristine TiO<sub>2</sub>, TiO<sub>2-δ</sub>, CNT-TiO<sub>2-δ</sub>-5, CNTs-TiO<sub>2-δ</sub>-15 and CNTs-TiO<sub>2-δ</sub>-60, respectively.

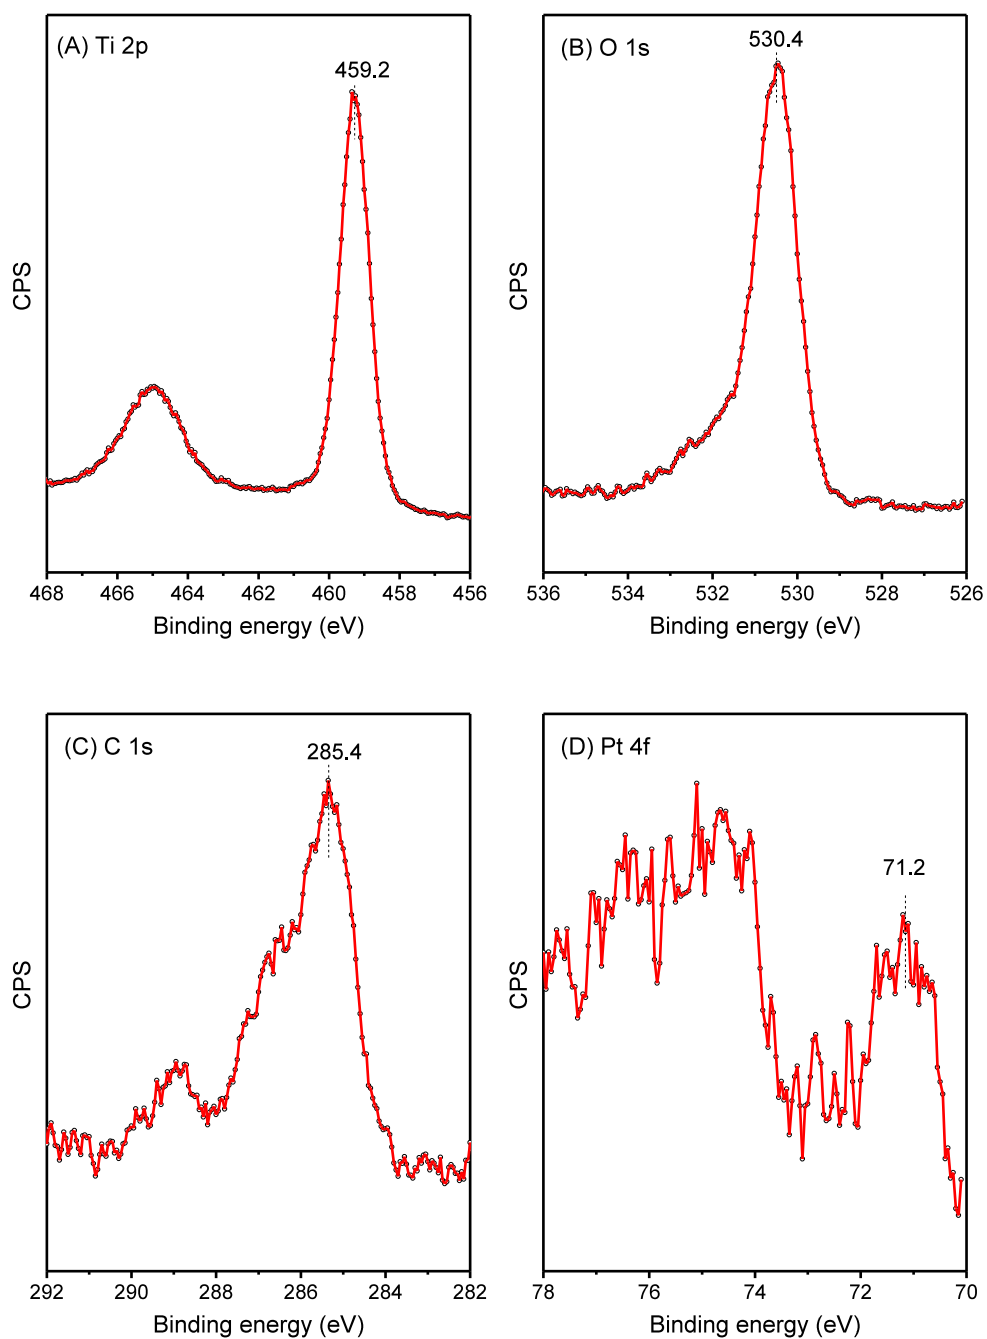

**Figure S6.** XP Ti 2p (A), O 1s (B), C 1s (C) and Pt 4f (D) spectra for pristine TiO<sub>2</sub> with photodeposited Pt (0.1 wt%) after photocatalytic reactions.

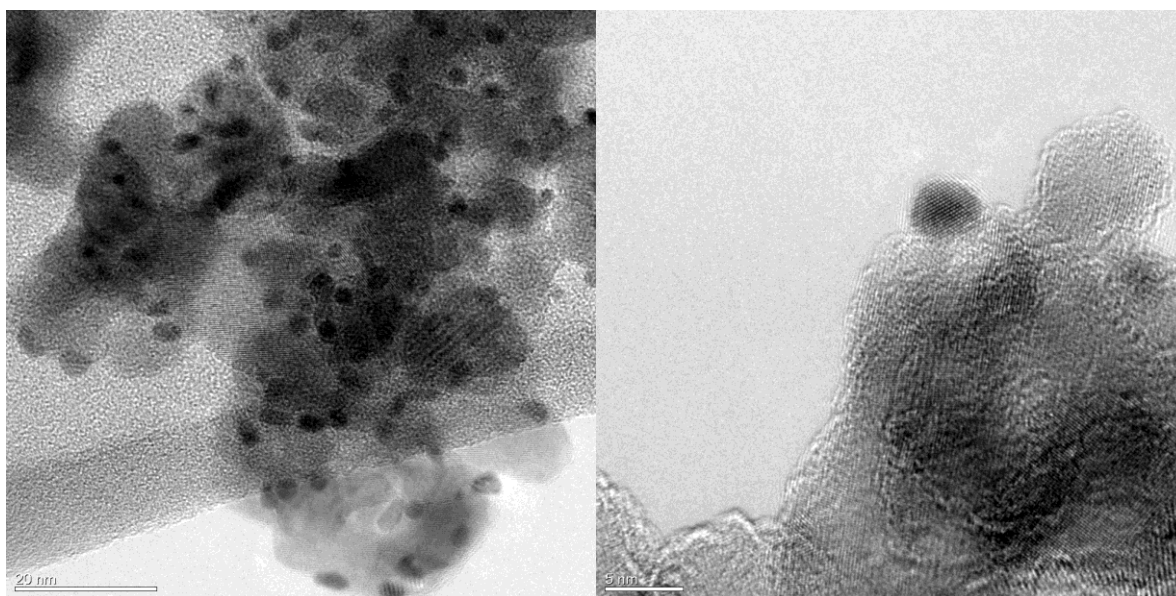

**Figure S7.** TEM images for photodeposited Pt nanoparticles on  $\text{TiO}_{2-\delta}$ .

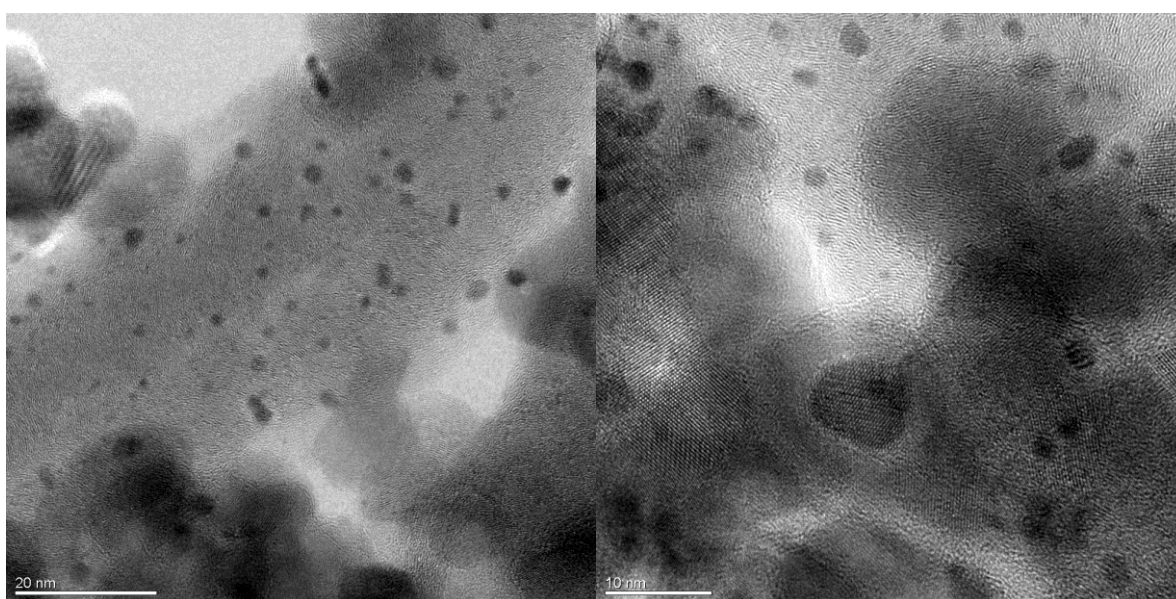

**Figure S8.** TEM images for photodeposited Pt nanoparticles on CNT- $\text{TiO}_{2-\delta}$ -60.

**Table S1.** Surface compositions (in atomic percent, at%) of the  $\text{TiO}_2$  photocatalysts after reactions derived from the quantitative XPS studies. Platinum (0.1 wt%) was photodeposited as co-catalyst.

|                | C     | O     | Ti    | Pt   |
|----------------|-------|-------|-------|------|
| $\text{TiO}_2$ | 20.05 | 56.60 | 23.21 | 0.14 |
